# Supplementary material for: Integrating agro-physiological traits and yield performance in soybean (Glycine max L.) resistance to fall armyworm (Spodoptera frugiperda) through genotype analysis
Source: PeerJ. 2026 Feb 4;14:e20753. doi: 10.7717/peerj.20753 (PMC12882726; doi:10.7717/peerj.20753)
Supplement: Supplemental Information 1 — This dataset contains raw observations of agrophysiological traits in soybean genotypes. Variables include repetition, genotype, and measurements of leaf trichome density (across multiple leaves) and their averages. The data were collected to assess resistance to Spodoptera litura and are essential for analyzing the impact of morphological traits on pest resistance. [file peerj-14-20753-s001.csv]

## Sheet: Leaf Trichome Density
Repetation	Genotype	Leaf Trichome Density			Mean
1	UBASK16	22	20	21	21
	UBASK13	24	19	19	20.6667
	UBASK14	42	30	38	36.6667
	UBASK12	21	19	24	21.3333
	UBASK15	30	36	29	31.6667
	UBASK61	39	33	36	36
	UBASK63	14	17	20	17
	UBASK64	25	42	45	37.3333
	UBASK62	39	47	23	36.3333						3
	UBASK65	25	18	23	22
	UBASK31	20	26	30	25.3333
	UBASK36	18	30	22	23.3333
	UBASK34	18	27	32	25.6667
	UBASK32	25	23	20	22.6667
	UBASK35	21	20	17	19.3333
	UBASK41	32	35	38	35
	UBASK46	40	35	23	32.6667
	UBASK43	22	30	26	26
	UBASK42	43	38	50	43.6667
	UBASK45	60	48	30	46
	UBASK21	26	30	27	27.6667
	UBASK26	27	22	30	26.3333
	UBASK23	21	15	24	20
	UBASK24	28	28	38	31.3333
	UBASK25	34	48	42	41.3333
	UBASK51	48	39	34	40.3333
	UBASK56	32	41	46	39.6667
	UBASK53	49	57	50	52
	UBASK54	33	42	34	36.3333
	UBASK52	23	30	26	26.3333
	AJM	21	29	17	22.3333
	AGP	22	25	22	23
	GBG	38	44	39	40.3333
	TGM	21	21	23	21.6667
	UB 1	39	33	36	36
	UB 2	27	32	29	29.3333
2	UBASK16	28	36	33	32.3333
	UBASK13	18	17	10	15
	UBASK14	41	47	27	38.3333
	UBASK12	29	25	13	22.3333
	UBASK15	18	30	19	22.3333
	UBASK61	28	33	21	27.3333
	UBASK63	17	14	14	15
	UBASK64	37	41	30	36
	UBASK62	20	28	23	23.6667
	UBASK65	11	18	9	12.6667
	UBASK31	14	20	20	18
	UBASK36	20	26	17	21
	UBASK34	25	16	22	21
	UBASK32	31	24	31	28.6667
	UBASK35	39	30	25	31.3333
	UBASK41	27	20	26	24.3333
	UBASK46	26	19	20	21.6667
	UBASK43	19	16	20	18.3333
	UBASK42	44	22	30	32
	UBASK45	24	31	26	27
	UBASK21	20	18	20	19.3333
	UBASK26	67	49	33	49.6667
	UBASK23	21	23	18	20.6667
	UBASK24	26	24	29	26.3333
	UBASK25	22	28	23	24.3333
	UBASK51	35	45	42	40.6667
	UBASK56	58	42	45	48.3333
	UBASK53	22	18	27	22.3333
	UBASK54	44	36	29	36.3333
	UBASK52	53	47	36	45.3333
	AJM	48	38	38	41.3333
	AGP	21	18	25	21.3333
	GBG	32	40	42	38
	TGM	26	23	20	23
	UB 1	30	33	28	30.3333
	UB 2	38	45	43	42
3	UBASK16	17	25	10	17.3333
	UBASK13	19	26	25	23.3333
	UBASK14	53	53	37	47.6667
	UBASK12	15	21	21	19
	UBASK15	30	19	26	25
	UBASK61	46	33	21	33.3333
	UBASK63	9	10	7	8.66667
	UBASK64	40	46	28	38
	UBASK62	23	21	30	24.6667
	UBASK65	12	28	15	18.3333
	UBASK31	25	33	20	26
	UBASK36	18	15	18	17
	UBASK34	26	20	23	23
	UBASK32	24	17	24	21.6667
	UBASK35	45	33	38	38.6667
	UBASK41	23	22	26	23.6667
	UBASK46	11	16	19	15.3333
	UBASK43	9	16	20	15
	UBASK42	46	55	51	50.6667
	UBASK45	19	17	16	17.3333
	UBASK21	15	13	20	16
	UBASK26	23	26	20	23
	UBASK23	13	14	18	15
	UBASK24	37	27	39	34.3333
	UBASK25	19	16	17	17.3333
	UBASK51	38	30	50	39.3333
	UBASK56	20	30	23	24.3333
	UBASK53	13	10	14	12.3333
	UBASK54	27	33	42	34
	UBASK52	15	18	34	22.3333
	AJM	12	17	19	16
	AGP	9	10	17	12
	GBG	39	27	39	35
	TGM	12	10	12	11.3333
	UB 1	37	28	24	29.6667
	UB 2	42	28	30	33.3333

## Sheet: Leaf Area 4 Day After Planting
Repetation	Genotype	LA 4 DAP
1	UBASK16	64.7143
	UBASK13	87.25
	UBASK14	85.5
	UBASK12	82.3333
	UBASK15	79.7143
	UBASK61	129.833
	UBASK63	87.5
	UBASK64	87.2222
	UBASK62	124.875
	UBASK65	104.6
	UBASK31	111
	UBASK36	94.2857
	UBASK34	92.4
	UBASK32	107
	UBASK35	87.625
	UBASK41	76.8333
	UBASK46	104.333
	UBASK43	85.5
	UBASK42	130
	UBASK45	88.3333
	UBASK21	108.833
	UBASK26	79.9
	UBASK23	103.25
	UBASK24	65
	UBASK25	96
	UBASK51	109.667
	UBASK56	113.833
	UBASK53	94.3333
	UBASK54	124
	UBASK52	82.1667
	AJM	97
	AGP	116.6
	GBG	118
	TGM	73.2
	UB 1	133.333
	UB 2	111.333
2	UBASK16	78.0769
	UBASK13	101.875
	UBASK14	107.778
	UBASK12	75.3333
	UBASK15	97.3
	UBASK61	132.6
	UBASK63	89.1667
	UBASK64	105.667
	UBASK62	104.125
	UBASK65	86.25
	UBASK31	104.286
	UBASK36	102.857
	UBASK34	99
	UBASK32	99.1667
	UBASK35	86.6667
	UBASK41	71
	UBASK46	91
	UBASK43	70
	UBASK42	118.8
	UBASK45	82.8571
	UBASK21	91.4286
	UBASK26	127.143
	UBASK23	128.571
	UBASK24	130
	UBASK25	110
	UBASK51	130.556
	UBASK56	68.75
	UBASK53	90.8333
	UBASK54	86
	UBASK52	47
	AJM	80.8333
	AGP	57.5
	GBG	109
	TGM	82.8571
	UB 1	57
	UB 2	47
3	UBASK16	69.125
	UBASK13	97.1429
	UBASK14	92.1429
	UBASK12	115
	UBASK15	65.4286
	UBASK61	96.6667
	UBASK63	99.2857
	UBASK64	73.5714
	UBASK62	97.7273
	UBASK65	112.857
	UBASK31	82.8571
	UBASK36	84
	UBASK34	89
	UBASK32	104
	UBASK35	126.2
	UBASK41	127.571
	UBASK46	90
	UBASK43	78.875
	UBASK42	70.4286
	UBASK45	108.286
	UBASK21	59.7143
	UBASK26	72.2
	UBASK23	109
	UBASK24	97.5
	UBASK25	89.7143
	UBASK51	101.25
	UBASK56	99.2857
	UBASK53	86.8571
	UBASK54	88.75
	UBASK52	65.7143
	AJM	114
	AGP	50.625
	GBG	99.7143
	TGM	74.25
	UB 1	99
	UB 2	62.8571

## Sheet: Leaf Area 6 Day After Planting
Repetation	Genotype	LA 6 DAP
1	UBASK16	89.4737
	UBASK13	56.8125
	UBASK14	99.8182
	UBASK12	79.25
	UBASK15	50.4706
	UBASK61	69.2
	UBASK63	47.8333
	UBASK64	55.4615
	UBASK62	73.5385
	UBASK65	58.0833
	UBASK31	65.4615
	UBASK36	71.6316
	UBASK34	86.125
	UBASK32	62.4
	UBASK35	56.5417
	UBASK41	95.5455
	UBASK46	71.5
	UBASK43	30.5
	UBASK42	128.55
	UBASK45	98.8421
	UBASK21	85.2222
	UBASK26	79
	UBASK23	90.25
	UBASK24	81.8571
	UBASK25	116.462
	UBASK51	103.6
	UBASK56	99.0714
	UBASK53	86.2632
	UBASK54	69.9
	UBASK52	36.6364
	AJM	65.5
	AGP	105.25
	GBG	119.5
	TGM	51.6875
	UB 1	70.5294
	UB 2	92.9474
2	UBASK16	32.9167
	UBASK13	85.2083
	UBASK14	94.5789
	UBASK12	55.7778
	UBASK15	48.1333
	UBASK61	114.333
	UBASK63	43.3
	UBASK64	70.7273
	UBASK62	56.9333
	UBASK65	69
	UBASK31	60.4
	UBASK36	74.6667
	UBASK34	74.75
	UBASK32	73
	UBASK35	75.6818
	UBASK41	44
	UBASK46	90.5
	UBASK43	74.75
	UBASK42	84.55
	UBASK45	93.1429
	UBASK21	79.9091
	UBASK26	108
	UBASK23	104.188
	UBASK24	102.75
	UBASK25	66.3684
	UBASK51	108.154
	UBASK56	74.8333
	UBASK53	69
	UBASK54	71.3636
	UBASK52	60.3333
	AJM	57.5714
	AGP	51.9091
	GBG	79.5455
	TGM	53.8824
	UB 1	100
	UB 2	59.6
3	UBASK16	75.25
	UBASK13	112.533
	UBASK14	83.4444
	UBASK12	90.7222
	UBASK15	53.85
	UBASK61	85.6667
	UBASK63	123
	UBASK64	113.929
	UBASK62	105.059
	UBASK65	96.8571
	UBASK31	69.5625
	UBASK36	48.3158
	UBASK34	98.6923
	UBASK32	75.9286
	UBASK35	68.6429
	UBASK41	78.875
	UBASK46	79.4167
	UBASK43	43.4
	UBASK42	106.176
	UBASK45	28.1818
	UBASK21	84.4118
	UBASK26	84.375
	UBASK23	85.7692
	UBASK24	75.9286
	UBASK25	69.5556
	UBASK51	68.8889
	UBASK56	98.1538
	UBASK53	44.9
	UBASK54	98.4167
	UBASK52	57.9375
	AJM	66.0667
	AGP	57
	GBG	37.8333
	TGM	39.9333
	UB 1	44.1538
	UB 2	70

## Sheet: Plant Height
Repetation	Genotype	PH
1	UBASK16	80.5
	UBASK13	59
	UBASK14	54
	UBASK12	66
	UBASK15	39.5
	UBASK61	73.5
	UBASK63	47.5
	UBASK64	51.75
	UBASK62	54
	UBASK65	40.25
	UBASK31	37.5
	UBASK36	40.25
	UBASK34	45.75
	UBASK32	64.5
	UBASK35	66
	UBASK41	65.25
	UBASK46	48.75
	UBASK43	60.75
	UBASK42	42
	UBASK45	72
	UBASK21	72.5
	UBASK26	67.5
	UBASK23	63
	UBASK24	80.5
	UBASK25	73
	UBASK51	61.5
	UBASK56	67
	UBASK53	62.5
	UBASK54	72.5
	UBASK52	64.5
	AJM	73.5
	AGP	48
	GBG	62
	TGM	64
	UB 1	72.5
	UB 2	72
2	UBASK16	74
	UBASK13	54.25
	UBASK14	56.25
	UBASK12	59.5
	UBASK15	54
	UBASK61	78.5
	UBASK63	52
	UBASK64	66
	UBASK62	75
	UBASK65	37.5
	UBASK31	41
	UBASK36	39.5
	UBASK34	53.5
	UBASK32	71.5
	UBASK35	75
	UBASK41	77
	UBASK46	54
	UBASK43	57.25
	UBASK42	48.5
	UBASK45	67.5
	UBASK21	58
	UBASK26	55.5
	UBASK23	57.5
	UBASK24	70.5
	UBASK25	71
	UBASK51	61.5
	UBASK56	68
	UBASK53	71
	UBASK54	68
	UBASK52	60.5
	AJM	76
	AGP	65.5
	GBG	61
	TGM	58.5
	UB 1	58
	UB 2	62.5
3	UBASK16	59.25
	UBASK13	57.25
	UBASK14	57.75
	UBASK12	78
	UBASK15	75
	UBASK61	84
	UBASK63	54.25
	UBASK64	51.5
	UBASK62	71.5
	UBASK65	37.5
	UBASK31	62.25
	UBASK36	61.75
	UBASK34	60.5
	UBASK32	69.5
	UBASK35	62.25
	UBASK41	73.5
	UBASK46	46.25
	UBASK43	61.75
	UBASK42	47.5
	UBASK45	61.5
	UBASK21	60
	UBASK26	68.5
	UBASK23	53.5
	UBASK24	72
	UBASK25	68.5
	UBASK51	60
	UBASK56	67
	UBASK53	60
	UBASK54	66
	UBASK52	73.5
	AJM	72
	AGP	35.5
	GBG	55.5
	TGM	61.5
	UB 1	61
	UB 2	78.5

## Sheet: Number of Leaf
Repetation	Genotype	NL
1	UBASK16	13
	UBASK13	17
	UBASK14	10
	UBASK12	12.5
	UBASK15	10.5
	UBASK61	13
	UBASK63	12
	UBASK64	13.5
	UBASK62	17.5
	UBASK65	12
	UBASK31	9
	UBASK36	13.5
	UBASK34	12.5
	UBASK32	10.5
	UBASK35	12
	UBASK41	11.5
	UBASK46	10.5
	UBASK43	10
	UBASK42	12
	UBASK45	12
	UBASK21	10
	UBASK26	22.5
	UBASK23	10.5
	UBASK24	15
	UBASK25	13
	UBASK51	11
	UBASK56	15
	UBASK53	16
	UBASK54	12.5
	UBASK52	12
	AJM	12
	AGP	14.5
	GBG	14
	TGM	14
	UB 1	9.5
	UB 2	12
2	UBASK16	11.5
	UBASK13	14.5
	UBASK14	11.5
	UBASK12	14
	UBASK15	18
	UBASK61	9.5
	UBASK63	13.5
	UBASK64	16
	UBASK62	11.5
	UBASK65	14.5
	UBASK31	13
	UBASK36	16.5
	UBASK34	14
	UBASK32	10
	UBASK35	15.5
	UBASK41	16
	UBASK46	14
	UBASK43	12
	UBASK42	11
	UBASK45	12
	UBASK21	8.5
	UBASK26	11
	UBASK23	8.5
	UBASK24	13
	UBASK25	14.5
	UBASK51	12.5
	UBASK56	11.5
	UBASK53	16.5
	UBASK54	13.5
	UBASK52	10.5
	AJM	10
	AGP	11.5
	GBG	13
	TGM	14
	UB 1	11
	UB 2	18.5
3	UBASK16	11
	UBASK13	15.5
	UBASK14	11.5
	UBASK12	14.5
	UBASK15	18.5
	UBASK61	11.5
	UBASK63	11
	UBASK64	12.5
	UBASK62	15.5
	UBASK65	13.5
	UBASK31	15.5
	UBASK36	13.5
	UBASK34	8
	UBASK32	10.5
	UBASK35	12.5
	UBASK41	13
	UBASK46	14
	UBASK43	14
	UBASK42	12
	UBASK45	13
	UBASK21	10.5
	UBASK26	13.5
	UBASK23	11
	UBASK24	12
	UBASK25	13.5
	UBASK51	12.5
	UBASK56	14
	UBASK53	14
	UBASK54	13
	UBASK52	15.5
	AJM	14.5
	AGP	9
	GBG	15.5
	TGM	20.5
	UB 1	14.5
	UB 2	19

## Sheet: Time Flowering
Repetation	Genotype	TF (day)
1	UBASK16	46
	UBASK13	46
	UBASK14	41
	UBASK12	46
	UBASK15	41
	UBASK61	41
	UBASK63	41
	UBASK64	46
	UBASK62	46
	UBASK65	36
	UBASK31	41
	UBASK36	46
	UBASK34	41
	UBASK32	41
	UBASK35	41
	UBASK41	41
	UBASK46	41
	UBASK43	46
	UBASK42	41
	UBASK45	43
	UBASK21	41
	UBASK26	41
	UBASK23	41
	UBASK24	41
	UBASK25	41
	UBASK51	41
	UBASK56	41
	UBASK53	41
	UBASK54	35
	UBASK52	41
	AJM	41
	AGP	35
	GBG	31
	TGM	47
	UB 1	41
	UB 2	41
2	UBASK16	41
	UBASK13	41
	UBASK14	36
	UBASK12	41
	UBASK15	35
	UBASK61	41
	UBASK63	41
	UBASK64	41
	UBASK62	41
	UBASK65	36
	UBASK31	36
	UBASK36	46
	UBASK34	36
	UBASK32	41
	UBASK35	41
	UBASK41	41
	UBASK46	41
	UBASK43	41
	UBASK42	41
	UBASK45	43
	UBASK21	41
	UBASK26	41
	UBASK23	41
	UBASK24	41
	UBASK25	41
	UBASK51	41
	UBASK56	41
	UBASK53	41
	UBASK54	36
	UBASK52	41
	AJM	41
	AGP	35
	GBG	31
	TGM	47
	UB 1	41
	UB 2	41
3	UBASK16	46
	UBASK13	41
	UBASK14	41
	UBASK12	46
	UBASK15	35
	UBASK61	41
	UBASK63	35
	UBASK64	46
	UBASK62	41
	UBASK65	35
	UBASK31	41
	UBASK36	41
	UBASK34	36
	UBASK32	41
	UBASK35	46
	UBASK41	41
	UBASK46	41
	UBASK43	41
	UBASK42	41
	UBASK45	43
	UBASK21	41
	UBASK26	41
	UBASK23	41
	UBASK24	41
	UBASK25	41
	UBASK51	41
	UBASK56	41
	UBASK53	41
	UBASK54	35
	UBASK52	41
	AJM	41
	AGP	41
	GBG	31
	TGM	47
	UB 1	41
	UB 2	41

## Sheet: Harvest Age
Repetation	Genotype	HA (day)
1	UBASK16	84
	UBASK13	84
	UBASK14	84
	UBASK12	84
	UBASK15	84
	UBASK61	84
	UBASK63	84
	UBASK64	84
	UBASK62	84
	UBASK65	84
	UBASK31	84
	UBASK36	84
	UBASK34	84
	UBASK32	84
	UBASK35	84
	UBASK41	84
	UBASK46	84
	UBASK43	84
	UBASK42	84
	UBASK45	84
	UBASK21	84
	UBASK26	84
	UBASK23	84
	UBASK24	84
	UBASK25	84
	UBASK51	84
	UBASK56	84
	UBASK53	84
	UBASK54	84
	UBASK52	84
	AJM	84
	AGP	84
	GBG	84
	TGM	84
	UB 1	84
	UB 2	84
2	UBASK16	84
	UBASK13	84
	UBASK14	84
	UBASK12	84
	UBASK15	84
	UBASK61	84
	UBASK63	84
	UBASK64	84
	UBASK62	84
	UBASK65	84
	UBASK31	84
	UBASK36	84
	UBASK34	84
	UBASK32	84
	UBASK35	84
	UBASK41	84
	UBASK46	84
	UBASK43	84
	UBASK42	84
	UBASK45	84
	UBASK21	84
	UBASK26	84
	UBASK23	84
	UBASK24	84
	UBASK25	84
	UBASK51	84
	UBASK56	84
	UBASK53	84
	UBASK54	84
	UBASK52	84
	AJM	84
	AGP	84
	GBG	84
	TGM	84
	UB 1	84
	UB 2	84
3	UBASK16	84
	UBASK13	84
	UBASK14	84
	UBASK12	84
	UBASK15	84
	UBASK61	84
	UBASK63	84
	UBASK64	84
	UBASK62	84
	UBASK65	84
	UBASK31	84
	UBASK36	84
	UBASK34	84
	UBASK32	84
	UBASK35	84
	UBASK41	84
	UBASK46	84
	UBASK43	84
	UBASK42	84
	UBASK45	84
	UBASK21	84
	UBASK26	84
	UBASK23	84
	UBASK24	84
	UBASK25	84
	UBASK51	84
	UBASK56	84
	UBASK53	84
	UBASK54	84
	UBASK52	84
	AJM	84
	AGP	84
	GBG	84
	TGM	84
	UB 1	84
	UB 2	84

## Sheet: Number of Productive Branches
Repetation	Genotype	NPB
1	UBASK16	5
	UBASK13	4
	UBASK14	2.5
	UBASK12	3.5
	UBASK15	3.5
	UBASK61	4
	UBASK63	3
	UBASK64	4.5
	UBASK62	3
	UBASK65	5
	UBASK31	3.5
	UBASK36	4
	UBASK34	5
	UBASK32	4.5
	UBASK35	3
	UBASK41	5
	UBASK46	3
	UBASK43	1.5
	UBASK42	3
	UBASK45	3.5
	UBASK21	1
	UBASK26	8
	UBASK23	2.5
	UBASK24	3
	UBASK25	3.5
	UBASK51	5.5
	UBASK56	5.5
	UBASK53	3
	UBASK54	2.5
	UBASK52	5
	AJM	3
	AGP	3.5
	GBG	2.5
	TGM	5.5
	UB 1	3
	UB 2	5
2	UBASK16	3
	UBASK13	2.5
	UBASK14	2.5
	UBASK12	4.5
	UBASK15	5
	UBASK61	4.5
	UBASK63	5
	UBASK64	5
	UBASK62	3.5
	UBASK65	3.5
	UBASK31	4
	UBASK36	3.5
	UBASK34	4
	UBASK32	3.5
	UBASK35	3.5
	UBASK41	3
	UBASK46	5
	UBASK43	3
	UBASK42	4.5
	UBASK45	4
	UBASK21	4
	UBASK26	3.5
	UBASK23	2
	UBASK24	3
	UBASK25	4
	UBASK51	3
	UBASK56	4.5
	UBASK53	3.5
	UBASK54	4.5
	UBASK52	2.5
	AJM	3
	AGP	3
	GBG	2
	TGM	4.5
	UB 1	3.5
	UB 2	4.5
3	UBASK16	2.5
	UBASK13	2.5
	UBASK14	2.5
	UBASK12	4
	UBASK15	4.5
	UBASK61	3.5
	UBASK63	3
	UBASK64	4
	UBASK62	4.5
	UBASK65	2.5
	UBASK31	3.5
	UBASK36	4
	UBASK34	2.5
	UBASK32	2
	UBASK35	4
	UBASK41	3.5
	UBASK46	5.5
	UBASK43	3.5
	UBASK42	4.5
	UBASK45	3.5
	UBASK21	4.5
	UBASK26	4.5
	UBASK23	1.5
	UBASK24	3.5
	UBASK25	3.5
	UBASK51	4
	UBASK56	3
	UBASK53	3.5
	UBASK54	3
	UBASK52	3
	AJM	3.5
	AGP	2.5
	GBG	2.5
	TGM	6
	UB 1	3.5
	UB 2	3

## Sheet: Number of Fertile Nodes
Repetation	Genotype	NFN
1	UBASK16	25.5
	UBASK13	24.5
	UBASK14	18
	UBASK12	21.5
	UBASK15	14
	UBASK61	21
	UBASK63	20.5
	UBASK64	24
	UBASK62	19.5
	UBASK65	14
	UBASK31	18
	UBASK36	20.5
	UBASK34	18
	UBASK32	27.5
	UBASK35	22.5
	UBASK41	19
	UBASK46	19
	UBASK43	14
	UBASK42	19.5
	UBASK45	20
	UBASK21	13
	UBASK26	35
	UBASK23	16
	UBASK24	20
	UBASK25	16
	UBASK51	26
	UBASK56	34.5
	UBASK53	20
	UBASK54	15
	UBASK52	26
	AJM	20
	AGP	21.5
	GBG	14.5
	TGM	32
	UB 1	17
	UB 2	28.5
2	UBASK16	19
	UBASK13	23.5
	UBASK14	13.5
	UBASK12	20.5
	UBASK15	27
	UBASK61	22
	UBASK63	21
	UBASK64	23
	UBASK62	14
	UBASK65	17.5
	UBASK31	16.5
	UBASK36	25
	UBASK34	18
	UBASK32	19
	UBASK35	24
	UBASK41	17
	UBASK46	20.5
	UBASK43	16
	UBASK42	16
	UBASK45	18
	UBASK21	25
	UBASK26	22.5
	UBASK23	12
	UBASK24	13
	UBASK25	18.5
	UBASK51	19
	UBASK56	24.5
	UBASK53	14
	UBASK54	16
	UBASK52	12
	AJM	12.5
	AGP	13.5
	GBG	14.5
	TGM	29
	UB 1	17
	UB 2	24
3	UBASK16	19
	UBASK13	24
	UBASK14	17.5
	UBASK12	24.5
	UBASK15	26.5
	UBASK61	22.5
	UBASK63	14
	UBASK64	14.5
	UBASK62	24.5
	UBASK65	13
	UBASK31	20
	UBASK36	23
	UBASK34	11.5
	UBASK32	12.5
	UBASK35	21
	UBASK41	17
	UBASK46	21.5
	UBASK43	14.5
	UBASK42	19
	UBASK45	25
	UBASK21	17.5
	UBASK26	28
	UBASK23	17.5
	UBASK24	17
	UBASK25	15.5
	UBASK51	19
	UBASK56	28.5
	UBASK53	13.5
	UBASK54	16.5
	UBASK52	16
	AJM	18
	AGP	11
	GBG	11
	TGM	33
	UB 1	17
	UB 2	24.5

## Sheet: Number of Pod
Repetation	Genotype	NP
1	UBASK16	81.5
	UBASK13	65.5
	UBASK14	36
	UBASK12	51
	UBASK15	34
	UBASK61	48.5
	UBASK63	45.5
	UBASK64	50
	UBASK62	45.5
	UBASK65	41
	UBASK31	51
	UBASK36	49
	UBASK34	43
	UBASK32	55.5
	UBASK35	63.5
	UBASK41	44
	UBASK46	38.5
	UBASK43	25
	UBASK42	41.5
	UBASK45	62.5
	UBASK21	40
	UBASK26	57.5
	UBASK23	43
	UBASK24	44
	UBASK25	45
	UBASK51	47.5
	UBASK56	74
	UBASK53	46.5
	UBASK54	46
	UBASK52	60
	AJM	57.5
	AGP	37.5
	GBG	30.5
	TGM	77
	UB 1	44
	UB 2	53
2	UBASK16	58.5
	UBASK13	61
	UBASK14	33
	UBASK12	56.5
	UBASK15	60
	UBASK61	44
	UBASK63	51
	UBASK64	61.5
	UBASK62	46
	UBASK65	41
	UBASK31	40.5
	UBASK36	58
	UBASK34	35.5
	UBASK32	40
	UBASK35	74
	UBASK41	51.5
	UBASK46	41.5
	UBASK43	28
	UBASK42	37.5
	UBASK45	65
	UBASK21	81
	UBASK26	44.5
	UBASK23	32.5
	UBASK24	28.5
	UBASK25	52.5
	UBASK51	46.5
	UBASK56	50.5
	UBASK53	40.5
	UBASK54	52
	UBASK52	33
	AJM	48
	AGP	28
	GBG	28
	TGM	73
	UB 1	42
	UB 2	47
3	UBASK16	51.5
	UBASK13	65.5
	UBASK14	38
	UBASK12	55
	UBASK15	57.5
	UBASK61	57
	UBASK63	39.5
	UBASK64	38.5
	UBASK62	59
	UBASK65	37
	UBASK31	47.5
	UBASK36	61
	UBASK34	31
	UBASK32	31.5
	UBASK35	76.5
	UBASK41	45
	UBASK46	44.5
	UBASK43	24
	UBASK42	37.5
	UBASK45	63
	UBASK21	55.5
	UBASK26	51.5
	UBASK23	39.5
	UBASK24	39.5
	UBASK25	50
	UBASK51	38.5
	UBASK56	54
	UBASK53	24.5
	UBASK54	51
	UBASK52	39.5
	AJM	48.5
	AGP	18.5
	GBG	27.5
	TGM	105
	UB 1	33.5
	UB 2	47.5

[truncated: 3 more sheets: Number of Filled Pod, Harvest Index, Weight of 100 Seeds]
