# Supplementary material for: Integrating agro-physiological traits and yield performance in soybean (Glycine max L.) resistance to fall armyworm (Spodoptera frugiperda) through genotype analysis
Source: PeerJ. 2026 Feb 4;14:e20753. doi: 10.7717/peerj.20753 (PMC12882726; doi:10.7717/peerj.20753)
Supplement: Supplemental Information 2 — This dataset includes raw data on Spodoptera litura attack intensity and frequency in soybean genotypes. It provides information on the number of attacks, intensity scores, and frequency percentages, as well as the number of leaf samples analyzed. The data are critical for assessing the variation in pest resistance across genotypes under controlled field conditions. [file peerj-14-20753-s002.csv]

## Sheet: Intensity and Frequency 36 DAP
Repetation	Genotype		Attacks Intensity					Number of Leaf Samples	Intensity		Frequency
			0	< 25%	25-50%	50-75%	75-100%		Intensity	Average	Frequency	Average
1	UBASK16	A	3	2	1	2	1	9	38.8889	33.3333	66.6667	77.7778
		B	1	7	0	1	0	9	27.7778		88.8889
	UBASK13	A	1	5	1	1	1	9	38.8889	41.3194	88.8889	86.1111
		B	2	4	3	1	2	12	43.75		83.3333
	UBASK14	A	0	4	1	1	0	6	37.5	40.1786	100	100
		B	0	3	3	1	0	7	42.8571		100
	UBASK12	A	1	4	2	1	0	8	34.375	43.2292	87.5	85.4167
		B	2	3	2	2	3	12	52.0833		83.3333
	UBASK15	A	0	0	2	1	3	6	79.1667	78.4722	100	100
		B	0	1	1	3	4	9	77.7778		100
	UBASK61	A	1	1	3	4	0	9	52.7778	54.5139	88.8889	94.4444
		B	0	4	0	2	2	8	56.25		100
	UBASK63	A	3	2	3	1	0	9	30.5556	40.2778	66.6667	70.8333
		B	2	1	2	1	2	8	50		75
	UBASK64	A	1	2	2	3	3	11	61.3636	55.6818	90.9091	95.4545
		B	0	5	2	1	2	10	50		100
	UBASK62	A	0	2	3	2	5	12	70.8333	74.1667	100	100
		B	0	0	3	3	4	10	77.5		100
	UBASK65	A	0	4	2	2	2	10	55	54.0625	100	93.75
		B	1	0	5	1	1	8	53.125		87.5
	UBASK31	A	1	2	2	2	2	9	55.5556	55.9028	88.8889	81.9444
		B	1	0	0	3	0	4	56.25		75
	UBASK36	A	0	1	3	0	11	15	85	76.875	100	91.6667
		B	2	2	0	1	7	12	68.75		83.3333
	UBASK34	A	3	2	2	3	0	10	37.5	51.25	70	80
		B	1	1	2	3	3	10	65		90
	UBASK32	A	1	0	2	3	4	10	72.5	73.75	90	95
		B	0	0	3	3	3	9	75		100
	UBASK35	A	3	4	3	0	1	11	31.8182	32.8734	72.7273	72.0779
		B	4	3	5	2	0	14	33.9286		71.4286
	UBASK41	A	2	3	2	0	3	10	47.5	44.2045	80	80.9091
		B	2	2	5	2	0	11	40.9091		81.8182
	UBASK46	A	1	5	1	1	0	8	31.25	28.125	87.5	83.75
		B	2	6	2	0	0	10	25		80
	UBASK43	A	3	0	0	1	1	5	35	32.2727	40	56.3636
		B	3	4	3	1	0	11	29.5455		72.7273
	UBASK42	A	5	3	2	0	0	10	17.5	20.1136	50	47.7273
		B	6	2	2	0	1	11	22.7273		45.4545
	UBASK45	A	2	3	0	3	0	8	37.5	43.75	75	70.8333
		B	3	0	3	0	3	9	50		66.6667
	UBASK21	A	1	3	0	4	1	9	52.7778	37.5	88.8889	88.8889
		B	1	8	0	0	0	9	22.2222		88.8889
	UBASK26	A	6	2	0	1	2	11	29.5455	43.5227	45.4545	52.7273
		B	4	0	0	1	5	10	57.5		60
	UBASK23	A	4	0	0	4	2	10	50	45.4545	60	57.2727
		B	5	0	1	4	1	11	40.9091		54.5455
	UBASK24	A	8	0	0	3	3	14	37.5	30.4167	42.8571	44.7619
		B	8	4	0	2	1	15	23.3333		46.6667
	UBASK25	A	6	0	1	0	3	10	35	31.9231	40	39.2308
		B	8	1	0	2	2	13	28.8462		38.4615
	UBASK51	A	6	4	2	0	0	12	16.6667	11.0119	50	35.7143
		B	11	3	0	0	0	14	5.35714		21.4286
	UBASK56	A	8	4	0	0	1	13	15.3846	17.3077	38.4615	38.4615
		B	8	0	5	0	0	13	19.2308		38.4615
	UBASK53	A	6	3	0	2	0	11	20.4545	17.7273	45.4545	37.7273
		B	7	0	3	0	0	10	15		30
	UBASK54	A	6	2	0	0	0	8	6.25	14.4886	25	39.7727
		B	5	2	4	0	0	11	22.7273		54.5455
	UBASK52	A	5	5	2	0	0	12	18.75	23.0114	58.3333	60.9848
		B	4	5	0	1	1	11	27.2727		63.6364
	AJM	A	6	2	5	0	1	14	28.5714	39.2857	57.1429	61.9048
		B	4	1	0	5	2	12	50		66.6667
	AGP	A	5	2	0	0	3	10	35	32.0833	50	50
		B	6	0	5	0	1	12	29.1667		50
	GBG	A	8	2	0	1	2	13	25	22.3214	38.4615	44.2308
		B	7	5	0	2	0	14	19.6429		50
	TGM	A	14	1	1	0	0	16	4.6875	7.70089	12.5	20.5357
		B	10	2	2	0	0	14	10.7143		28.5714
	UB 1	A	6	4	2	0	1	13	23.0769	16.3462	53.8462	38.4615
		B	10	2	0	1	0	13	9.61538		23.0769
	UB 2	A	18	2	0	0	2	22	11.3636	11.36	18.1818	18.18
		B	0	0	0	0	0	0	0		0
2	UBASK16	A	0	1	0	0	9	10	92.5	62.9167	100	83.3333
		B	4	2	5	0	1	12	33.3333		66.6667
	UBASK13	A	6	0	2	3	0	11	29.5455	30.0505	45.4545	50.5051
		B	4	2	0	3	0	9	30.5556		55.5556
	UBASK14	A	2	1	0	6	0	9	52.7778	46.3889	77.7778	68.8889
		B	4	0	2	4	0	10	40		60
	UBASK12	A	9	3	0	5	1	18	30.5556	31.1111	50	45
		B	9	0	0	5	1	15	31.6667		40
	UBASK15	A	2	4	4	0	0	10	30	34.4444	80	73.3333
		B	3	2	1	2	1	9	38.8889		66.6667
	UBASK61	A	8	3	0	2	0	13	17.3077	22.4038	38.4615	59.2308
		B	2	5	3	0	0	10	27.5		80
	UBASK63	A	2	0	3	3	2	10	57.5	46.9318	80	71.8182
		B	4	4	0	0	3	11	36.3636		63.6364
	UBASK64	A	5	3	1	0	1	10	22.5	39.0278	50	63.8889
		B	2	0	4	0	3	9	55.5556		77.7778
	UBASK62	A	5	5	0	2	0	12	22.9167	31.9129	58.3333	65.5303
		B	3	3	0	5	0	11	40.9091		72.7273
	UBASK65	A	4	3	0	5	1	13	42.3077	49.2788	69.2308	67.9487
		B	4	1	1	0	6	12	56.25		66.6667
	UBASK31	A	8	1	2	0	0	11	11.3636	18.1818	27.2727	38.6364
		B	5	2	1	2	0	10	25		50
	UBASK36	A	1	2	0	3	4	10	67.5	51.4583	90	65.8333
		B	7	0	1	1	3	12	35.4167		41.6667
	UBASK34	A	6	2	0	0	3	11	31.8182	44.6591	45.4545	72.7273
		B	0	1	5	4	0	10	57.5		100
	UBASK32	A	3	2	0	5	0	10	42.5	43.125	70	64.1667
		B	5	2	0	1	4	12	43.75		58.3333
	UBASK35	A	10	0	3	0	1	14	17.8571	22.3901	28.5714	37.3626
		B	7	3	0	1	2	13	26.9231		46.1538
	UBASK41	A	5	2	0	3	3	13	44.2308	28.7821	61.5385	44.1026
		B	11	1	2	1	0	15	13.3333		26.6667
	UBASK46	A	2	0	0	6	0	8	56.25	45.625	75	67.5
		B	4	2	0	4	0	10	35		60
	UBASK43	A	10	3	0	0	0	13	5.76923	11.2179	23.0769	28.2051
		B	8	2	0	2	0	12	16.6667		33.3333
	UBASK42	A	5	0	3	2	0	10	30	30	50	50
		B	5	1	2	1	1	10	30		50
	UBASK45	A	3	4	1	0	0	8	18.75	25.2841	62.5	53.9773
		B	6	0	1	4	0	11	31.8182		45.4545
	UBASK21	A	3	0	2	1	1	7	39.2857	30.5804	57.1429	53.5714
		B	4	1	3	0	0	8	21.875		50
	UBASK26	A	5	3	3	0	0	11	20.4545	22.7273	54.5455	41.5584
		B	5	0	0	1	1	7	25		28.5714
	UBASK23	A	5	0	1	2	0	8	25	41.6667	37.5	68.75
		B	0	2	0	4	0	6	58.3333		100
	UBASK24	A	6	0	2	0	1	9	22.2222	22.3611	33.3333	31.6667
		B	7	0	0	3	0	10	22.5		30
	UBASK25	A	4	0	2	3	1	10	42.5	47.8125	60	67.5
		B	2	0	2	3	1	8	53.125		75
	UBASK51	A	5	1	2	2	0	10	27.5	31.6071	50	60.7143
		B	2	2	1	2	0	7	35.7143		71.4286
	UBASK56	A	2	2	2	0	2	8	43.75	52.4306	75	76.3889
		B	2	1	0	3	3	9	61.1111		77.7778
	UBASK53	A	0	0	5	2	0	7	57.1429	66.0714	100	93.75
		B	1	0	0	4	3	8	75		87.5
	UBASK54	A	2	2	0	5	0	9	47.2222	33.6111	77.7778	63.8889
		B	5	2	3	0	0	10	20		50
	UBASK52	A	2	3	0	4	1	10	47.5	61.25	80	83.75
		B	1	0	0	4	3	8	75		87.5
	AJM	A	4	1	6	0	0	11	29.5455	32.6299	63.6364	74.6753
		B	1	4	0	2	0	7	35.7143		85.7143
	AGP	A	9	1	0	3	0	13	19.2308	22.1154	30.7692	35.3846
		B	6	2	0	0	2	10	25		40
	GBG	A	9	3	2	0	0	14	12.5	16.6667	35.7143	42.8571
		B	6	2	4	0	0	12	20.8333		50
	TGM	A	7	3	0	4	1	15	31.6667	52.0833	53.3333	66.6667
		B	2	0	0	3	5	10	72.5		80
	UB 1	A	2	4	0	1	2	9	41.6667	48.9583	77.7778	88.8889
		B	0	4	0	2	2	8	56.25		100
	UB 2	A	6	1	0	4	0	11	29.5455	24.7727	45.4545	47.7273
		B	5	3	1	1	0	10	20		50
3	UBASK16	A	0	0	4	1	0	5	55	47.5	100	100
		B	0	6	3	0	1	10	40		100
	UBASK13	A	3	2	3	0	0	8	25	15.2778	62.5	42.3611
		B	7	2	0	0	0	9	5.55556		22.2222
	UBASK14	A	2	3	2	2	0	9	36.1111	32.6389	77.7778	80.5556
		B	1	3	2	0	0	6	29.1667		83.3333
	UBASK12	A	3	3	3	0	0	9	25	28.5714	66.6667	69.0476
		B	4	2	8	0	0	14	32.1429		71.4286
	UBASK15	A	0	2	2	2	3	9	66.6667	51.1905	100	100
		B	0	5	1	1	0	7	35.7143		100
	UBASK61	A	4	2	0	0	0	6	8.33333	22.0238	33.3333	59.5238
		B	1	3	2	1	0	7	35.7143		85.7143
	UBASK63	A	2	5	0	0	0	7	17.8571	20.0397	71.4286	69.0476
		B	3	4	2	0	0	9	22.2222		66.6667
	UBASK64	A	0	0	7	0	1	8	56.25	48.125	100	100
		B	0	4	6	0	0	10	40		100
	UBASK62	A	4	3	8	0	1	16	35.9375	39.2188	75	87.5
		B	0	5	3	2	0	10	42.5		100
	UBASK65	A	4	4	3	0	0	11	22.7273	23.8636	63.6364	69.3182
		B	2	4	2	0	0	8	25		75
	UBASK31	A	3	5	2	0	1	11	29.5455	25.8838	72.7273	69.697
		B	3	4	2	0	0	9	22.2222		66.6667
	UBASK36	A	3	6	2	0	0	11	22.7273	18.8636	72.7273	66.3636
		B	2	3	0	0	0	5	15		60
	UBASK34	A	0	3	4	1	0	8	43.75	43.75	100	100
		B	0	0	0	0	0	0	0		0
	UBASK32	A	1	2	2	1	0	6	37.5	38.3929	83.3333	84.5238
		B	1	1	5	0	0	7	39.2857		85.7143
	UBASK35	A	9	2	0	0	0	11	4.54545	6.43939	18.1818	17.4242
		B	5	0	1	0	0	6	8.33333		16.6667
	UBASK41	A	5	2	4	0	0	11	22.7273	28.8636	54.5455	77.2727
		B	0	3	2	0	0	5	35		100
	UBASK46	A	2	4	2	1	2	11	43.1818	48.3766	81.8182	83.7662
		B	1	1	3	0	2	7	53.5714		85.7143
	UBASK43	A	1	3	3	0	0	7	32.1429	31.9805	85.7143	79.2208
		B	3	4	3	0	1	11	31.8182		72.7273
	UBASK42	A	8	2	0	0	2	12	20.8333	33.1439	33.3333	43.9394
		B	5	0	0	4	2	11	45.4545		54.5455
	UBASK45	A	3	3	0	4	3	13	51.9231	54.3706	76.9231	79.3706
		B	2	0	4	3	2	11	56.8182		81.8182
	UBASK21	A	7	1	0	2	0	10	17.5	24.375	30	40
		B	4	1	0	3	0	8	31.25		50
	UBASK26	A	2	4	0	5	0	11	43.1818	46.5909	81.8182	72.7273
		B	4	2	0	0	5	11	50		63.6364
	UBASK23	A	1	2	0	2	3	8	62.5	61.8056	87.5	77.0833
		B	3	0	0	2	4	9	61.1111		66.6667
	UBASK24	A	3	0	1	4	1	9	50	37.5	66.6667	58.3333
		B	6	3	0	3	0	12	25		50
	UBASK25	A	3	2	0	0	5	10	55	49.0909	70	62.2727
		B	5	1	0	2	3	11	43.1818		54.5455
	UBASK51	A	1	3	0	3	1	8	50	39.7727	87.5	71.0227
		B	5	3	0	2	1	11	29.5455		54.5455
	UBASK56	A	2	3	4	1	0	10	35	24.4444	80	62.2222
		B	5	3	1	0	0	9	13.8889		44.4444
	UBASK53	A	3	0	3	0	2	8	43.75	51.4205	62.5	72.1591
		B	2	3	0	1	5	11	59.0909		81.8182
	UBASK54	A	5	1	0	5	1	12	41.6667	45.8333	58.3333	66.6667
		B	2	1	0	5	0	8	50		75
	UBASK52	A	5	0	2	2	0	9	27.7778	38.8889	44.4444	57.2222
		B	3	0	4	0	3	10	50		70
	AJM	A	5	2	0	3	1	11	34.0909	40.6566	54.5455	66.1616
		B	2	3	0	2	2	9	47.2222		77.7778
	AGP	A	2	0	1	0	3	6	58.3333	60.4167	66.6667	83.3333
		B	0	2	0	3	1	6	62.5		100
	GBG	A	6	2	2	0	0	10	15	29.375	40	49.1667
		B	5	1	0	4	2	12	43.75		58.3333
	TGM	A	8	2	0	3	0	13	21.1538	20.5769	38.4615	39.2308
		B	6	2	0	2	0	10	20		40
	UB 1	A	3	2	1	2	0	8	31.25	33.125	62.5	61.25
		B	4	3	0	1	2	10	35		60
	UB 2	A	15	3	0	0	0	18	4.16667	3.33333	16.6667	13.3333
		B	9	1	0	0	0	10	2.5		10

## Sheet: Intensity and Frequency 41 DAP
Repetation	Genotype		Attacks Intensity					Number of Leaf Samples	Intensity		Frequency
			0	< 25%	25-50%	50-75%	75-100%		Intensity	Average	Frequency	Average
1	UBASK16	A	4	6	1	0	5	16	43.75	44.375	75	82.5
		B	1	4	2	2	1	10	45		90
	UBASK13	A	2	3	4	3	4	16	56.25	46.875	87.5	71.5278
		B	8	2	2	3	3	18	37.5		55.5556
	UBASK14	A	1	2	2	0	3	8	56.25	46.875	87.5	81.25
		B	3	4	2	2	1	12	37.5		75
	UBASK12	A	3	2	2	0	2	9	38.8889	50.6944	66.6667	77.0833
		B	2	1	3	7	3	16	62.5		87.5
	UBASK15	A	2	0	1	3	3	9	63.8889	64.2361	77.7778	76.3889
		B	3	0	2	1	6	12	64.5833		75
	UBASK61	A	4	2	4	3	1	14	41.0714	41.369	71.4286	69.0476
		B	4	1	4	1	2	12	41.6667		66.6667
	UBASK63	A	3	2	4	2	1	12	41.6667	47.9167	75	83.3333
		B	1	4	3	0	4	12	54.1667		91.6667
	UBASK64	A	2	1	3	1	7	14	67.8571	51.2363	85.7143	77.4725
		B	4	4	3	0	2	13	34.6154		69.2308
	UBASK62	A	0	0	3	3	13	19	88.1579	73.7664	100	96.875
		B	1	4	4	2	5	16	59.375		93.75
	UBASK65	A	4	3	5	0	1	13	32.6923	29.9825	69.2308	70.979
		B	3	5	2	1	0	11	27.2727		72.7273
	UBASK31	A	2	2	5	1	2	12	47.9167	38.5417	83.3333	75
		B	2	2	1	1	0	6	29.1667		66.6667
	UBASK36	A	1	2	2	0	7	12	70.8333	62.9167	91.6667	85.8333
		B	3	4	1	1	6	15	55		80
	UBASK34	A	1	7	5	2	1	16	42.1875	50.2604	93.75	96.875
		B	0	2	4	1	2	9	58.3333		100
	UBASK32	A	1	0	6	2	3	12	62.5	61.8056	91.6667	90.2778
		B	1	1	2	3	2	9	61.1111		88.8889
	UBASK35	A	2	4	5	0	1	12	37.5	32.2917	83.3333	75
		B	4	4	3	1	0	12	27.0833		66.6667
	UBASK41	A	5	1	4	0	3	13	40.3846	33.9423	61.5385	70.7692
		B	2	5	3	0	0	10	27.5		80
	UBASK46	A	1	4	0	3	1	9	47.2222	42.3611	88.8889	86.1111
		B	2	4	4	2	0	12	37.5		83.3333
	UBASK43	A	1	0	1	2	1	5	60	44.1667	80	63.3333
		B	8	3	0	2	2	15	28.3333		46.6667
	UBASK42	A	4	0	0	0	7	11	63.6364	49.1259	63.6364	54.8951
		B	7	0	0	6	0	13	34.6154		46.1538
	UBASK45	A	6	4	0	3	0	13	25	31.8182	53.8462	58.7413
		B	4	2	1	3	1	11	38.6364		63.6364
	UBASK21	A	4	2	0	5	0	11	38.6364	35.9848	63.6364	54.0404
		B	5	0	1	2	1	9	33.3333		44.4444
	UBASK26	A	13	3	0	3	3	22	27.2727	26.6798	40.9091	35.6719
		B	16	0	0	4	3	23	26.087		30.4348
	UBASK23	A	4	2	1	4	0	11	36.3636	30.6818	63.6364	61.8182
		B	4	2	4	0	0	10	25		60
	UBASK24	A	8	3	4	0	0	15	18.3333	19.1667	46.6667	50
		B	7	6	1	0	1	15	20		53.3333
	UBASK25	A	7	2	3	0	2	14	28.5714	31.994	50	58.3333
		B	4	5	0	0	3	12	35.4167		66.6667
	UBASK51	A	4	1	0	1	5	11	54.5455	39.7727	63.6364	63.6364
		B	4	3	4	0	0	11	25		63.6364
	UBASK56	A	7	5	0	2	1	15	25	20	53.3333	46.6667
		B	9	4	1	1	0	15	15		40
	UBASK53	A	10	2	3	0	1	16	18.75	22.6562	37.5	40.625
		B	9	1	4	0	2	16	26.5625		43.75
	UBASK54	A	8	1	0	2	2	13	28.8462	22.7564	38.4615	40.0641
		B	7	2	3	0	0	12	16.6667		41.6667
	UBASK52	A	2	2	3	0	5	12	58.3333	55.2083	83.3333	79.1667
		B	3	3	0	2	4	12	52.0833		75
	AJM	A	5	0	6	0	0	11	27.2727	22.2902	54.5455	54.1958
		B	6	5	2	0	0	13	17.3077		53.8462
	AGP	A	12	1	0	3	1	17	20.5882	28.0025	29.4118	48.0392
		B	4	3	1	4	0	12	35.4167		66.6667
	GBG	A	5	5	2	0	0	12	18.75	28.125	58.3333	63.5417
		B	5	4	2	4	1	16	37.5		68.75
	TGM	A	7	0	0	4	1	12	33.3333	27.6042	41.6667	39.5833
		B	10	1	2	3	0	16	21.875		37.5
	UB 1	A	6	0	1	0	2	9	27.7778	28.8889	33.3333	41.6667
		B	5	2	1	0	2	10	30		50
	UB 2	A	10	0	2	0	1	13	15.3846	11.36	23.0769	18.18
		B	6	5	0	0	0	11	0		0
2	UBASK16	A	1	2	6	2	0	11	45.4545	38.3523	90.9091	82.9545
		B	3	4	4	1	0	12	31.25		75
	UBASK13	A	5	7	4	0	0	16	23.4375	27.1034	68.75	72.8365
		B	3	6	2	2	0	13	30.7692		76.9231
	UBASK14	A	0	3	7	0	2	12	52.0833	56.7235	100	100
		B	0	1	6	2	2	11	61.3636		100
	UBASK12	A	4	3	4	2	1	14	37.5	42.8571	71.4286	78.5714
		B	2	3	5	2	2	14	48.2143		85.7143
	UBASK15	A	1	5	1	0	11	18	70.8333	63.8889	94.4444	88.8889
		B	3	3	4	2	6	18	56.9444		83.3333
	UBASK61	A	0	1	6	0	3	10	62.5	61.8056	100	100
		B	0	2	4	0	3	9	61.1111		100
	UBASK63	A	4	6	2	0	0	12	20.8333	23.75	66.6667	66.6667
		B	5	5	4	1	0	15	26.6667		66.6667
	UBASK64	A	2	8	6	0	0	16	31.25	35.9375	87.5	87.5
		B	2	4	9	0	1	16	40.625		87.5
	UBASK62	A	1	1	4	3	1	10	55	58.2692	90	87.3077
		B	2	2	2	2	5	13	61.5385		84.6154
	UBASK65	A	6	4	6	0	0	16	25	25	62.5	58.1731
		B	6	3	2	2	0	13	25		53.8462
	UBASK31	A	2	2	6	3	2	15	51.6667	62.197	86.6667	93.3333
		B	0	1	3	3	4	11	72.7273		100
	UBASK36	A	3	2	5	1	4	15	51.6667	50.8333	80	84.4444
		B	2	3	9	1	3	18	50		88.8889
	UBASK34	A	1	2	3	4	2	12	58.3333	52.6042	91.6667	89.5833
		B	2	3	8	1	2	16	46.875		87.5
	UBASK32	A	0	2	5	0	2	9	55.5556	41.4141	100	81.8182
		B	4	4	2	0	1	11	27.2727		63.6364
	UBASK35	A	2	7	2	3	2	16	43.75	45.2083	87.5	77.0833
		B	5	0	5	2	3	15	46.6667		66.6667
	UBASK41	A	5	5	4	3	1	18	36.1111	39.4841	72.2222	75.3968
		B	3	3	4	3	1	14	42.8571		78.5714
	UBASK46	A	4	5	5	0	0	14	26.7857	35.7143	71.4286	75
		B	3	3	4	2	2	14	44.6429		78.5714
	UBASK43	A	2	2	8	2	2	16	50	43.75	87.5	81.25
		B	2	2	3	0	1	8	37.5		75
	UBASK42	A	5	3	0	2	2	12	35.4167	37.7083	58.3333	49.1667
		B	6	0	0	0	4	10	40		40
	UBASK45	A	2	4	1	2	0	9	33.3333	24.1667	77.7778	48.8889
		B	12	0	0	3	0	15	15		20
	UBASK21	A	2	0	2	0	2	6	50	43.1818	66.6667	60.6061
		B	5	0	4	0	2	11	36.3636		54.5455
	UBASK26	A	5	4	0	4	1	14	35.7143	41.2946	64.2857	63.3929
		B	3	1	0	2	2	8	46.875		62.5
	UBASK23	A	2	3	0	2	0	7	32.1429	37.3214	71.4286	70.7143
		B	3	2	0	5	0	10	42.5		70
	UBASK24	A	8	1	2	0	1	12	18.75	18.3036	33.3333	38.0952
		B	8	4	0	2	0	14	17.8571		42.8571
	UBASK25	A	7	1	0	0	3	11	29.5455	22.4116	36.3636	26.5152
		B	15	0	0	1	2	18	15.2778		16.6667
	UBASK51	A	10	2	0	2	0	14	14.2857	16.2338	28.5714	32.4675
		B	7	2	1	0	1	11	18.1818		36.3636
	UBASK56	A	7	1	0	0	2	10	22.5	27.5962	30	41.9231
		B	6	3	0	2	2	13	32.6923		53.8462
	UBASK53	A	10	4	0	3	0	17	19.1176	24.4026	41.1765	45.5882
		B	8	3	0	4	1	16	29.6875		50
	UBASK54	A	7	0	3	2	1	13	30.7692	23.4203	46.1538	44.5055
		B	8	3	3	0	0	14	16.0714		42.8571
	UBASK52	A	6	3	0	1	2	12	29.1667	46.5278	50	63.8889
		B	2	0	2	1	4	9	63.8889		77.7778
	AJM	A	3	4	0	2	1	10	35	27.5	70	65
		B	4	5	0	1	0	10	20		60
	AGP	A	5	2	0	3	0	10	27.5	24.3269	50	48.0769
		B	7	2	3	1	0	13	21.1538		46.1538
	GBG	A	8	3	0	2	1	14	23.2143	22.0238	42.8571	50.5952
		B	5	4	3	0	0	12	20.8333		58.3333
	TGM	A	6	5	0	3	0	14	25	27.6786	57.1429	53.5714
		B	7	2	0	5	0	14	30.3571		50
	UB 1	A	5	1	2	1	2	11	36.3636	37.5	54.5455	50
		B	6	0	0	3	2	11	38.6364		45.4545
	UB 2	A	7	0	7	4	0	18	36.1111	30.5556	61.1111	51.6082
		B	11	3	0	4	1	19	25		42.1053
3	UBASK16	A	3	1	2	0	0	6	20.8333	28.3854	50	65.625
		B	3	4	8	1	0	16	35.9375		81.25
	UBASK13	A	6	1	7	1	0	15	30	23.5938	60	55
		B	8	6	1	1	0	16	17.1875		50
	UBASK14	A	0	2	3	5	3	13	67.3077	66.1538	100	95
		B	1	2	1	2	4	10	65		90
	UBASK12	A	4	2	3	3	0	12	35.4167	32.4142	66.6667	68.6275
		B	5	6	5	0	1	17	29.4118		70.5882
	UBASK15	A	5	2	4	0	4	15	43.3333	44.9621	66.6667	69.697
		B	6	6	1	3	6	22	46.5909		72.7273
	UBASK61	A	0	3	8	0	0	11	43.1818	45.5492	100	95.8333
		B	1	3	4	4	0	12	47.9167		91.6667
	UBASK63	A	2	4	4	0	2	12	41.6667	44.5833	83.3333	86.6667
		B	1	3	3	2	1	10	47.5		90
	UBASK64	A	0	0	1	0	10	11	95.4545	92.3701	100	100
		B	0	0	3	0	11	14	89.2857		100
	UBASK62	A	3	1	7	1	3	15	50	51.5625	80	80.625
		B	3	4	2	2	5	16	53.125		81.25
	UBASK65	A	2	7	3	2	0	14	33.9286	41.9643	85.7143	89.011
		B	1	2	7	2	1	13	50		92.3077
	UBASK31	A	5	4	6	1	3	19	40.7895	39.1447	73.6842	78.5088
		B	2	2	8	0	0	12	37.5		83.3333
	UBASK36	A	7	3	4	1	2	17	32.3529	37.4265	58.8235	69.4118
		B	2	1	5	2	0	10	42.5		80
	UBASK34	A	2	4	6	1	3	16	48.4375	43.75	87.5	100
		B	0	0	0	0	0	0	0		0
	UBASK32	A	4	2	1	2	3	12	45.8333	53.4722	66.6667	83.3333
		B	0	1	5	1	2	9	61.1111		100
	UBASK35	A	3	8	5	0	0	16	28.125	23.7847	81.25	68.4028
		B	4	3	2	0	0	9	19.4444		55.5556
	UBASK41	A	2	5	5	2	1	15	41.6667	53.7879	86.6667	93.3333
		B	0	2	4	1	4	11	65.9091		100
	UBASK46	A	0	2	6	0	6	14	67.8571	61.6071	100	82.1429
		B	5	1	1	0	7	14	55.3571		64.2857
	UBASK43	A	3	3	3	1	2	12	41.6667	41.1458	75	71.875
		B	5	1	7	1	2	16	40.625		68.75
	UBASK42	A	3	3	0	4	0	10	37.5	31.25	70	49.2857
		B	10	0	0	2	2	14	25		28.5714
	UBASK45	A	9	0	0	2	2	13	26.9231	27.8846	30.7692	46.1538
		B	5	5	0	2	1	13	28.8462		61.5385
	UBASK21	A	8	1	2	0	0	11	11.3636	13.1818	27.2727	33.6364
		B	6	2	2	0	0	10	15		40
	UBASK26	A	7	2	4	0	0	13	19.2308	13.1868	46.1538	37.3626
		B	10	4	0	0	0	14	7.14286		28.5714
	UBASK23	A	5	3	0	2	0	10	22.5	24.7917	50	54.1667
		B	5	4	0	3	0	12	27.0833		58.3333
	UBASK24	A	5	4	3	0	0	12	20.8333	20.8333	58.3333	62.5
		B	4	6	2	0	0	12	20.8333		66.6667
	UBASK25	A	6	0	4	2	2	14	39.2857	23.489	57.1429	32.4176
		B	12	0	0	0	1	13	7.69231		7.69231
	UBASK51	A	2	5	0	3	1	11	40.9091	32.0617	81.8182	62.3377
		B	8	3	0	2	1	14	23.2143		42.8571
	UBASK56	A	8	0	2	0	5	15	40	41.1538	46.6667	57.9487
		B	4	2	4	0	3	13	42.3077		69.2308
	UBASK53	A	4	5	0	2	1	12	31.25	25	66.6667	48.9583
		B	11	2	0	2	1	16	18.75		31.25
	UBASK54	A	5	3	0	4	0	12	31.25	26.0417	58.3333	54.1667
		B	6	2	4	0	0	12	20.8333		50
	UBASK52	A	11	3	0	1	0	15	10	12.8125	26.6667	32.0833
		B	10	4	0	2	0	16	15.625		37.5
	AJM	A	8	4	0	2	0	14	17.8571	20.5952	42.8571	41.4286
		B	9	0	5	0	1	15	23.3333		40
	AGP	A	3	0	0	2	6	11	68.1818	64.4481	72.7273	72.0779
		B	2	0	0	3	2	7	60.7143		71.4286
	GBG	A	6	0	4	6	0	16	40.625	40.3125	62.5	61.25
		B	6	0	5	2	2	15	40		60
	TGM	A	16	4	0	2	0	22	11.3636	14.8923	27.2727	34.689
		B	11	5	0	3	0	19	18.4211		42.1053
	UB 1	A	8	2	4	0	0	14	17.8571	18.9286	42.8571	38.0952
		B	10	2	0	2	1	15	20		33.3333
	UB 2	A	18	3	0	2	1	24	13.5417	13.0208	25	30.3571
		B	9	3	2	0	0	14	12.5		35.7143
