# Supplementary material for: Integrating agro-physiological traits and yield performance in soybean (Glycine max L.) resistance to fall armyworm (Spodoptera frugiperda) through genotype analysis
Source: PeerJ. 2026 Feb 4;14:e20753. doi: 10.7717/peerj.20753 (PMC12882726; doi:10.7717/peerj.20753)
Supplement: Supplemental Information 4 — This dataset provides raw data used for path analysis and dendrogram clustering of soybean genotypes. Variables include key agronomic traits such as leaf area at 4 and 6 days after planting (LA4DAP, LA6DAP), plant height (PH), number of leaves (NL), number of pods (NP), and 100-seed weight (W100). The data were collected to evaluate the interrelationships between traits contributing to resistance against Spodoptera litura and yield stability. [file peerj-14-20753-s004.csv]

## Sheet: Sheet1
Genotype	LTD	LA4DAP	LA6DAP	PH	NL	TF	HA	NPB	NFN	NP	NFP	HI	W100
UBASK16	35.67	101.25	110.16	83.25	13.67	44.33	89	5.33	26.5	61	56.33	0.642	12.19
UBASK13	27.56	117.17	119.6	62.08	14.17	44.33	90.33	6	28	61.83	56.33	0.566	10.68
UBASK14	57.44	107.89	113.45	81.83	11.33	41	85.33	3	16.5	25.17	25	0.724	12.85
UBASK12	33.67	84.37	96.94	73.17	12.5	42.67	89	4.67	21.33	40.33	40.33	0.628	10.49
UBASK15	40	109.86	96.78	81.83	15.17	35	90.33	3.5	22.83	47.83	44.5	0.657	12.19
UBASK61	37.44	139.39	114.88	85.5	11.83	42.67	86.33	3.5	20.5	43.67	42.33	0.616	11.34
UBASK63	35.56	110.14	100.34	67.33	11.67	35	87.67	2.67	18.33	48	47.67	0.672	10.02
UBASK64	34	107.5	103.08	67.58	12.83	41	82.67	5	21.83	45.83	44.5	0.626	12.1
UBASK62	39.22	106.42	114.01	81.17	11.17	42.67	82.67	3.17	20.83	53.83	52.5	0.709	11.81
UBASK65	31.44	101.03	122.58	54.25	11	35	83	4.83	15	30.17	30.17	0.732	11.43
UBASK31	37.67	102.1	137.7	61.08	10.67	41	93	3.17	21.67	43.5	41.83	0.517	16.73
UBASK36	21.22	89.93	101.01	64	15.17	39.33	91.33	4	29.83	61.17	57.33	0.512	7.84
UBASK34	29.89	107.59	137.7	70.92	14.5	35.33	82.67	3.33	15.5	33.83	31.83	0.762	13.61
UBASK32	27.11	114.92	148.86	90.5	15.17	37.33	89.67	4.67	24	51.5	49.5	0.618	14.08
UBASK35	36.67	96.97	96.2	87.5	14.83	41	91	3.33	19.5	41.5	36.83	0.647	10.11
UBASK41	31.22	123.19	136.07	73.92	12.67	41	89	4.67	16.67	35.5	33	0.756	14.08
UBASK46	29.67	108.66	96.92	64.92	12.83	39.33	92	4.5	18.17	40.83	40.5	0.59	12.29
UBASK43	24.22	86.39	104.99	78	11.83	37	83	2.33	13.17	30	29.33	0.681	11.15
UBASK42	63.33	110.97	136.4	76	11.83	41	83	3.33	15.67	32.17	31.33	0.665	13.23
UBSK45	36.44	102.58	122.11	79.5	11.17	43	89.33	5.33	21	51.67	49.5	0.597	10.3
UBSK21	30.33	79.94	141.8	86.33	11	41	82.67	2.83	19.67	52.33	52	0.688	11.34
UBSK26	36.22	84.4	90.54	78	11.5	37	83.33	2	15.33	29	28.83	0.64	12.57
UBASK23	26.33	117.53	137.71	84.67	12.17	41	84.33	3	17.33	42	40.5	0.512	15.12
UBASK24	34.22	115.68	91.84	85	16	35.67	82.67	3.83	18.67	32.67	32.5	0.643	19.18
UBASK25	31.33	92.62	99.85	65.33	16.67	41	82.67	3.5	23	56.67	54.83	0.683	13.23
UBASK51	45.22	117.8	129.64	72.33	13	41	82.67	4	17.5	34.5	33	0.602	15.21
UBASK56	37	114.1	98.19	77.67	15.33	41	83	4.17	28.5	62.33	61.33	0.559	8.69
UBASK53	32.22	94.87	89.95	74.33	14	37.33	85	3.5	16.33	42.83	42.67	0.689	13.99
UBASK54	47.44	108.53	84.71	74.83	13.5	35.33	82.67	3.83	19.67	42.67	41	0.734	16.73
UBASK52	35.11	116.14	92.98	66	14.83	41	82.67	2.67	18.83	47.33	45.5	0.725	13.32
AJM	21.33	145.91	111.39	79.17	13.83	39.33	83.33	3.33	18.33	38.33	35.83	0.659	12.47
AGP	24.67	93.56	77.35	71.33	13.83	37	85.67	2	17.17	35.17	34.17	0.65	12.29
GBG	60.78	123.17	127.49	68.5	15	32.33	82.67	3.17	16.33	27.5	26.83	0.774	19.75
TGM	18.67	81.19	109.33	76.17	16.5	47	84.33	5.83	26	57.5	54.17	0.457	9.45
UB 1	52.11	129.08	124.43	86.5	14.33	41	82.67	3.33	17.17	39.67	37.33	0.594	12.85
UB 2	52.78	107.19	95.72	76	18.33	41	82.67	5.5	26	51.67	50.33	0.644	10.49
